# Supplementary material for: Development of four-dimensional variational assimilation system based on the GRAPES–CUACE adjoint model (GRAPES–CUACE-4D-Var V1.0) and its application in emission inversion
Source: Copernicus journal article supplement (doi:10.5194/gmd-14-337-2021), 2021-01-22
Supplement: Supplementary file [file gmd-14-337-2021-supplement-title-page.pdf › gmd-14-337-2021-supplement-title-page.pdf]

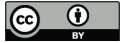

## *Supplement of*

# **Development of four-dimensional variational assimilation system based on the GRAPES–CUACE adjoint model (GRAPES–CUACE-4D-Var V1.0) and its application in emission inversion**

**Chao Wang et al.**

*Correspondence to:* Xingqin An ([anxq@cma.gov.cn](mailto:anxq@cma.gov.cn))

- [gmd-14-337-2021-supplement-title-page.pdf](#)
- [gmd\\_2019\\_313\\_Supplement](#)
  - [gmd-2019-313-Supplement.pdf](#)
  - [gmd\\_2019\\_313\\_supplement\\_code](#)
    - \* [GRAPES\\_CUACE\\_4D\\_Var\\_driver.F](#)

The copyright of individual parts of the supplement might differ from the CC BY 4.0 License.
